# Supplementary material for: Clear microstructure–performance relationships in Mn-containing perovskite and hexaaluminate compounds prepared by activated reactive synthesis
Source: Royal Society of Chemistry journal article supplement (doi:10.1039/c3cp54363c), 2014-01-01
Supplement: c3cp54363c.pdf [file c3cp54363c.pdf]

## Supporting Information for:

Clear microstructure-performance relationships in  
Mn-containing perovskite and hexaaluminate compounds  
prepared by Activated Reactive Synthesis

*Said Laassiri,<sup>a,b</sup> Nicolas Bion,<sup>a</sup> Daniel Duprez,<sup>a</sup> Sébastien Royer,<sup>\*a</sup> Houshang Alamdari<sup>\*b</sup>*

<sup>a</sup> *Department of Mining, Metallurgical and Materials Engineering, Université Laval, Québec (Québec), Canada, G1V 0A6. Tel: +1-418 656-7666;  
E-mail: [houshang.alamdari@gmn.ulaval.ca](mailto:houshang.alamdari@gmn.ulaval.ca)*

<sup>b</sup> *Université de Poitiers, UMR 7285 CNRS, IC2MP, 4 Rue Michel Brunet, 86022 Poitiers Cedex - France. Tel: +33-5-49-45-34-79; E-mail: [sebastien.royer@univ-poitiers.fr](mailto:sebastien.royer@univ-poitiers.fr)*

## Table content

|                                                                                                                                                                                                                       |     |
|-----------------------------------------------------------------------------------------------------------------------------------------------------------------------------------------------------------------------|-----|
| <b>Physical and textural characterizations</b> .....                                                                                                                                                                  | S.1 |
| <b>Fig. S1</b> Diffractograms recorded at each step of the synthesis for $\text{LaMnAl}_{11}\text{O}_{19}$ . (a) SRR-LaMnAl, (b) HEBM-LaMn, and (c) HE-LE(RT)-LaMnAl .....                                            | S.1 |
| <b>Fig. S2</b> Nitrogen adsorption/desorption isotherms recorded for selected mixed oxides ( $\blacktriangle$ ) HE-LE(CR)-LaMn, ( $\bullet$ )HE-LE(RT)-LaMnAl. ....                                                   | S.1 |
| <br>                                                                                                                                                                                                                  |     |
| <b>Manganese reducibility</b> .....                                                                                                                                                                                   | S.2 |
| <b>Fig S3</b> Temperature programmed reduction profiles recorded over $\text{LaMnO}_{3+\delta}$ : (a) SSR-LaMn; (b) HEBM-LaMn; (c) HE-LE(CR)-LaMn. ....                                                               | S.2 |
| <b>Fig S4</b> Temperature programmed reduction profiles recorded over $\text{LaMnAl}_{11}\text{O}_{19-\delta}$ : (a) SSR-LaMnAl; (b) HEBM-LaMnAl; (c) HE-LE(RT)-LaMnAl .....                                          | S.2 |
| <br>                                                                                                                                                                                                                  |     |
| <b>Temperature-programmed isotopic exchange</b> .....                                                                                                                                                                 | S.3 |
| <b>Fig S5</b> Evolution of the fraction of oxygen exchanged from the solid with the reaction temperature. ( $\blacklozenge$ ) SSR-LaMn; ( $\blacktriangle$ ) HEBM-LaMn; ( $\blacksquare$ ) HE-LE (CR)-LaMn. ....      | S.3 |
| <b>Fig S6</b> Evolution of the fraction of oxygen exchanged from the solid with the reaction temperature. ( $\blacklozenge$ ) SSR-LaMnAl, ( $\blacksquare$ ) HEBM-LaMnAl, ( $\blacktriangle$ ) HE-LE(RT)-LaMnAl. .... | S.3 |

## Physical and textural characterizations

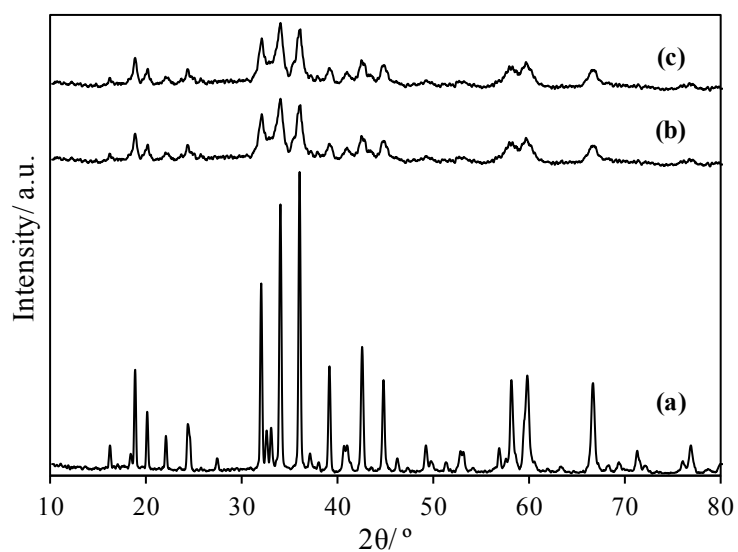

**Fig. S1** Diffractograms recorded at each step of the synthesis for  $\text{LaMnAl}_{11}\text{O}_{19}$ . (a) SRR-LaMnAl, (b) HEBM-LaMn, and (c) HE-LE(RT)-LaMnAl.

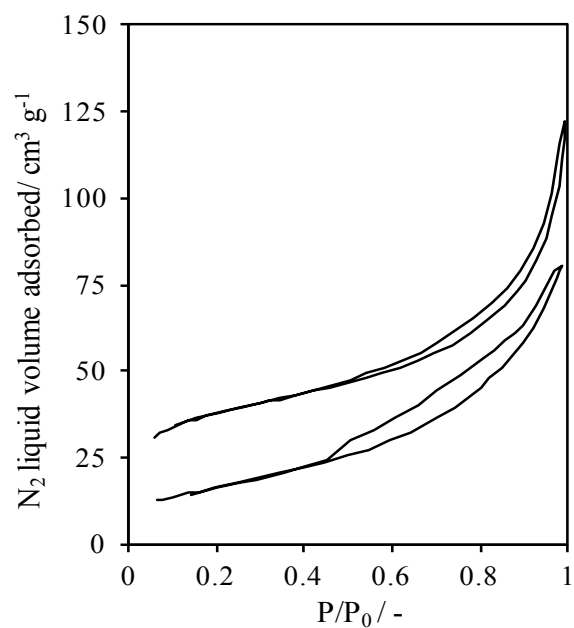

**Fig. S2** Nitrogen adsorption/desorption isotherms recorded for selected mixed oxides ( $\blacktriangle$ ) HE-LE(CR)-LaMn, ( $\bullet$ )HE-LE(RT)-LaMnAl.

### Manganese reducibility

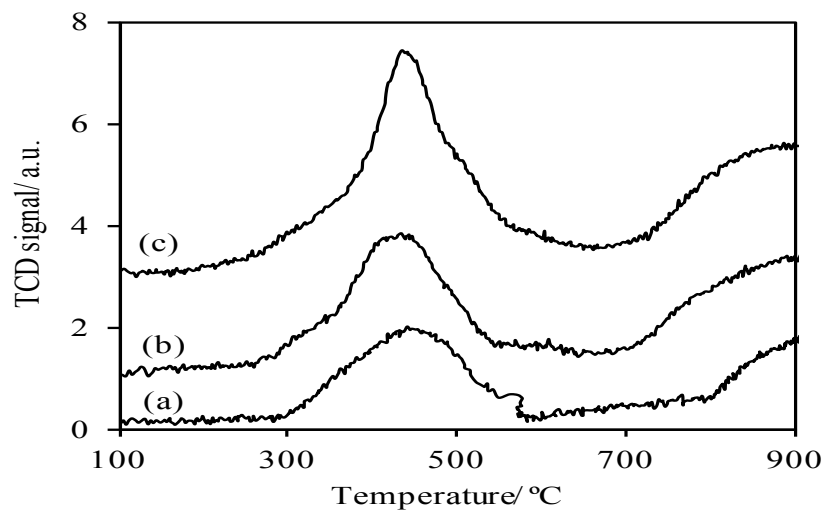

**Fig S3** Temperature programmed reduction profiles recorded over  $\text{LaMnO}_{3+\delta}$ : (a) SSR-LaMn; (b) HEBM-LaMn; (c) HE-LE(CR)-LaMn.

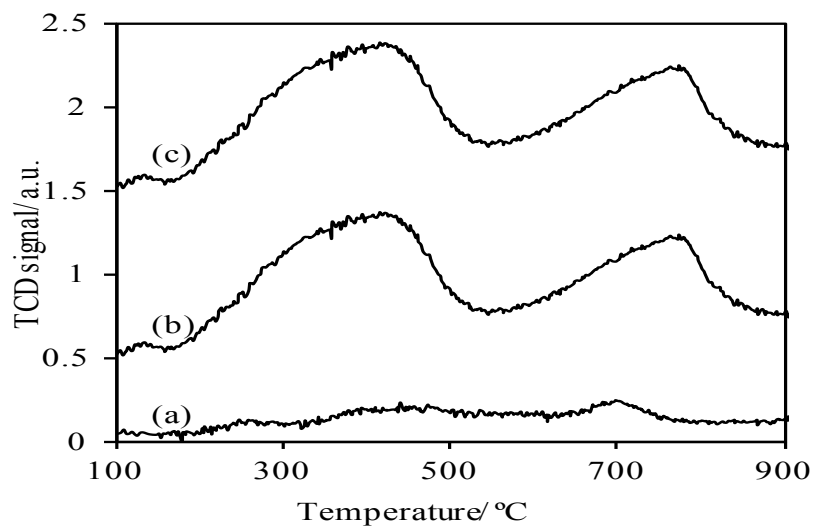

**Fig S4** Temperature programmed reduction profiles recorded over  $\text{LaMnAl}_{11}\text{O}_{19-\delta}$ : (a) SSR-LaMnAl; (b) HEBM-LaMnAl; (c) HE-LE(RT)-LaMnAl.

### Temperature-programmed isotopic exchange

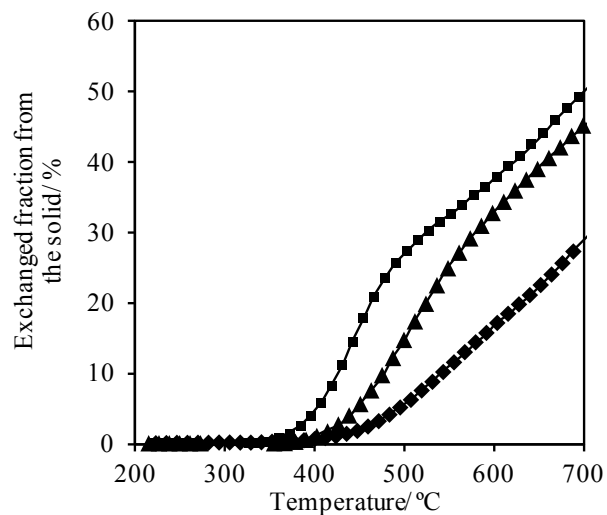

**Fig S5** Evolution of the fraction of oxygen exchanged from the solid with the reaction temperature. (◆) SSR-LaMn; (▲) HEBM-LaMn; (■) HE-LE (CR)-LaMn.

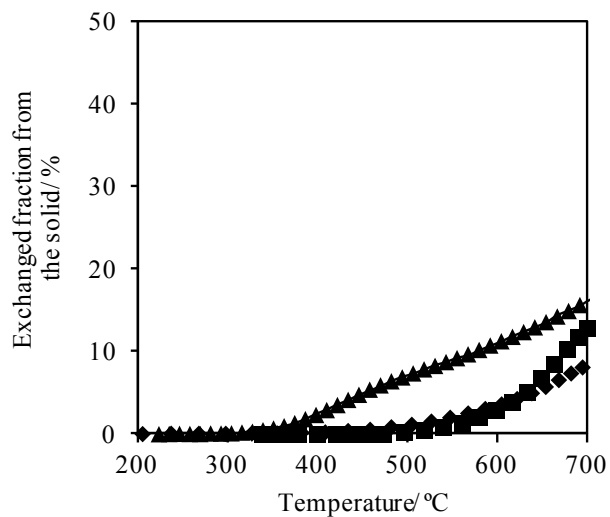

**Fig S6** Evolution of the fraction of oxygen exchanged from the solid with the reaction temperature. (◆) SSR-LaMnAl, (■) HEBM-LaMnAl, (▲) HE-LE(RT)-LaMnAl.
